# Supplementary material
Source: PubMed Central journal article supplement (PMC11028138)
Supplement: 262_2018_2235_MOESM1_ESM.pdf [file 262_2018_2235_MOESM1_ESM.pdf]

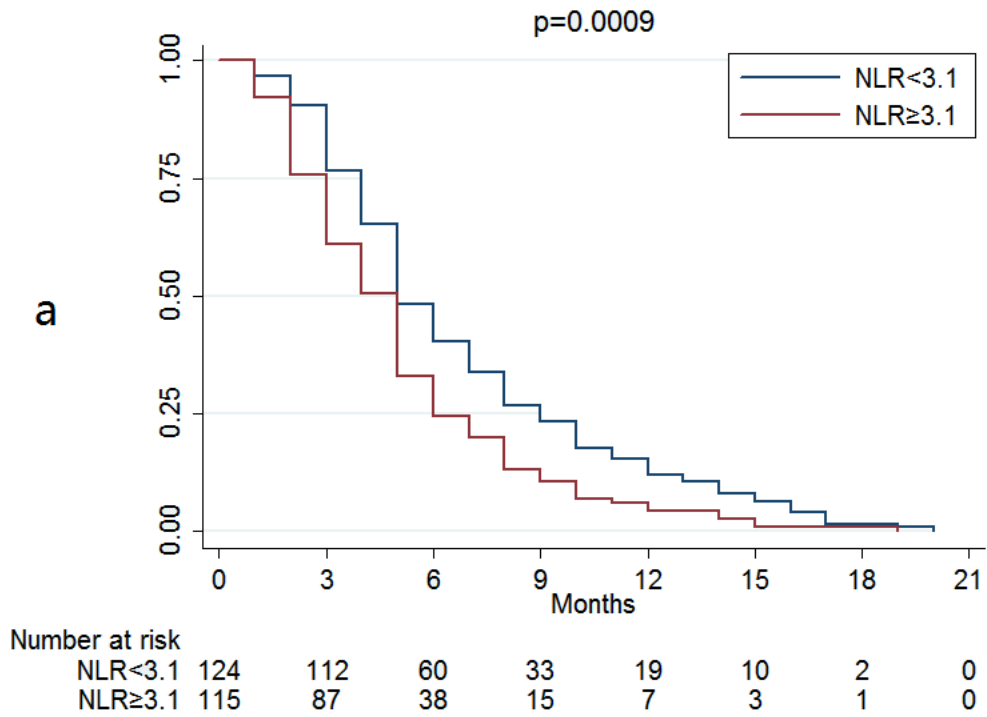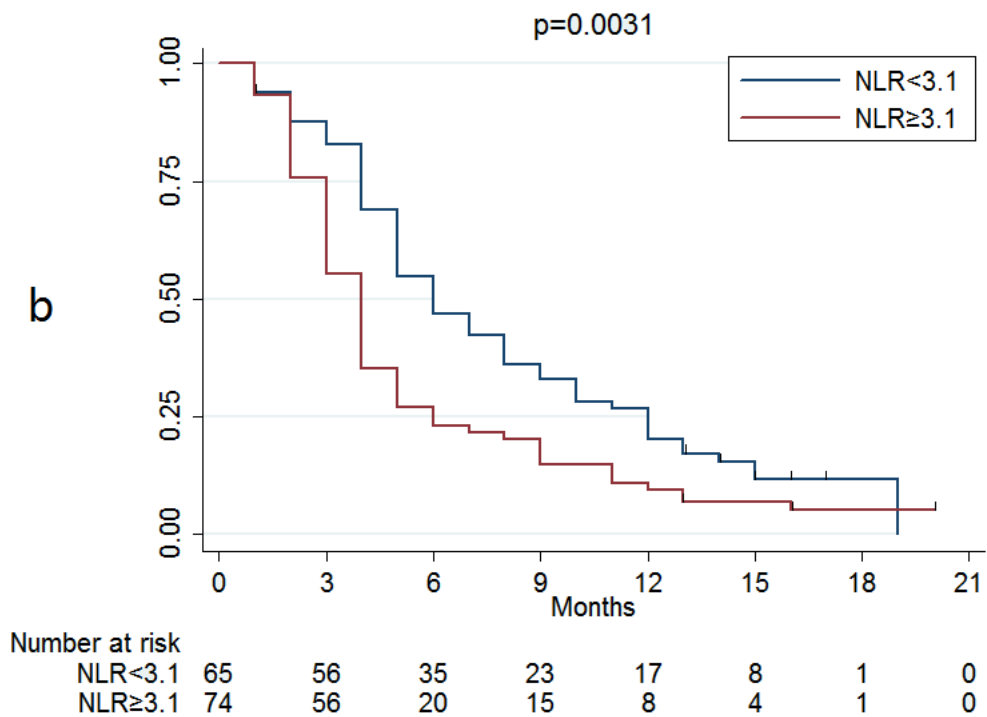

**Supplement Figure 1 Caption**

Supplement Figure1. Kaplan-Meier Survival Curves on different levels of NLR. **a.** Derivation cohort **b.** Validation cohort.

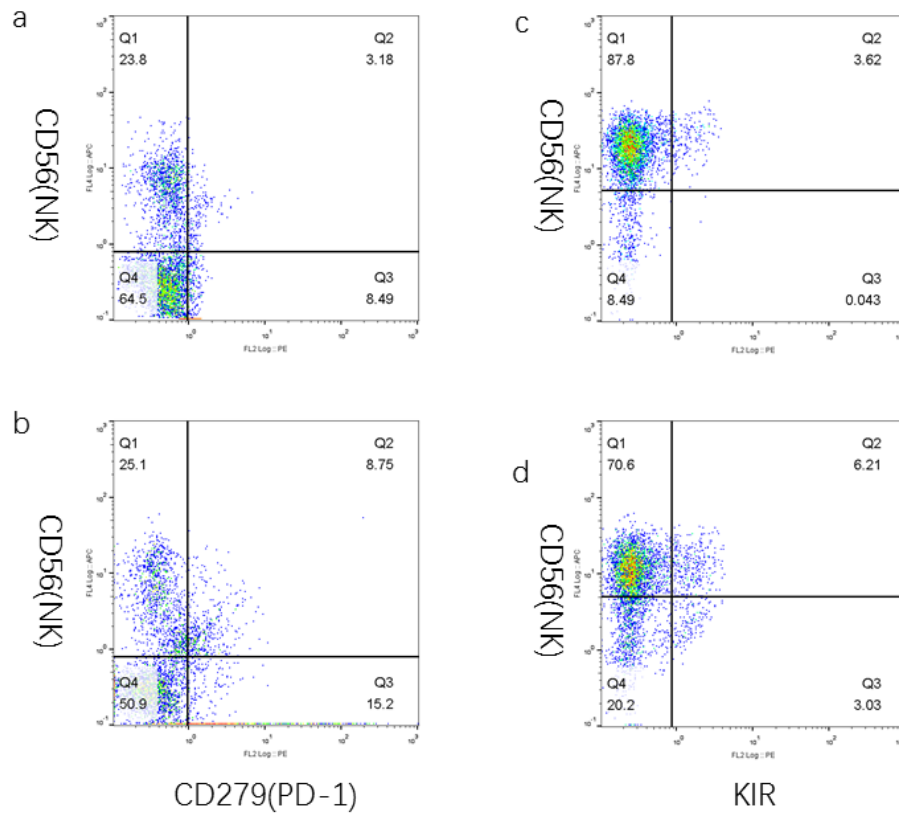

### Supplement Figure 2 Caption

Supplement Figure 2. PD-1 is up-regulated on NK cells upon co-culture with SW1990 and is accompanied by some markers of functionality. NK cell percentages were evaluated using anti-CD56 mAb, and PD-1 was analyzed using anti-CD279 mAb. KIR, an inhibitory receptor marker of NK cell function, was also analyzed using anti-KIR. a. Baseline expression of PD-1, 3.18%. b. After 7 days, PD-1 values increased to 8.75%. c. Baseline expression of KIR, 3.62%. d. After 7 days, KIR values increased to 6.21%.
